# Supplementary material for: Controlled synthesis of truncated octahedral bismuth micron particles with giant positive magnetoresistance
Source: Royal Society of Chemistry journal article supplement (doi:10.1039/c5ce01228g), 2015-01-01
Supplement: c5ce01228g1.pdf [file c5ce01228g1.pdf]

## Electronic Supplementary Information

### Controlled synthesis of Truncated Octahedral Bismuth Micron Particles with Giant Positive Magnetoresistance

Longlong Ma,<sup>a, †</sup> Yayang Tian,<sup>a, †</sup> Chao Yang,<sup>a</sup> Yong Li,<sup>a</sup> Zhaoxin Zhou,<sup>a</sup> Xike Tian<sup>\*a</sup> and Yanxin Wang<sup>b</sup>

<sup>a</sup>*Faculty of Materials Science and Chemistry, China University of Geosciences,  
430074 Wuhan, P.R.China. E-mail: [xktian@cug.edu.cn](mailto:xktian@cug.edu.cn); Fax: +86-27-67884574;  
Tel: +86-27-67884574*

<sup>b</sup>*School of Environmental Studies, China University of Geosciences, Wuhan, Hubei,  
430074, P. R. China*

\*Corresponding author: Xike Tian; E-mail: [xktian@cug.edu.cn](mailto:xktian@cug.edu.cn) (Xike Tian).

† Co-first authors, contributed equally to the article.

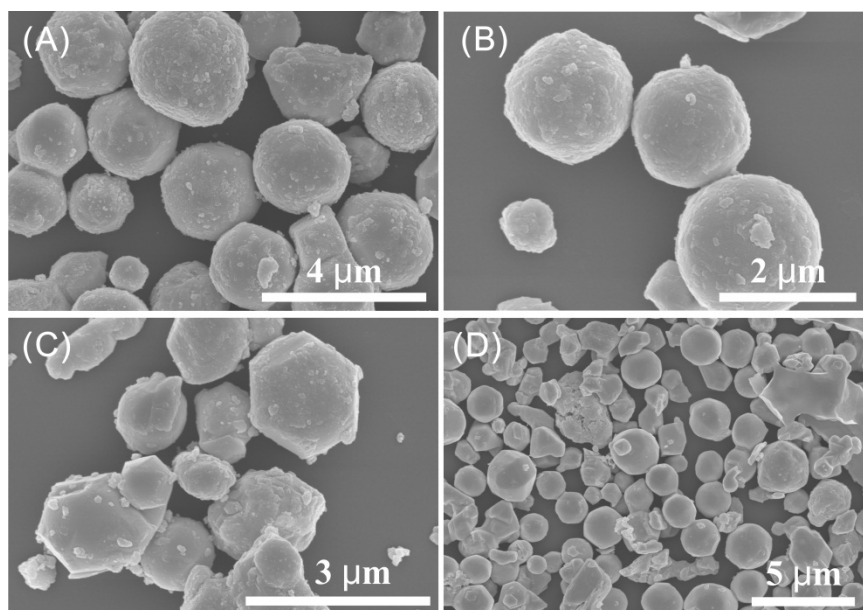

Fig.S1 SEM images of samples synthesized with adding different dosage of the CTAC. A: 0.6 mmol, B: 1.5 mmol, C: 6 mmol, D: 15 mmol.

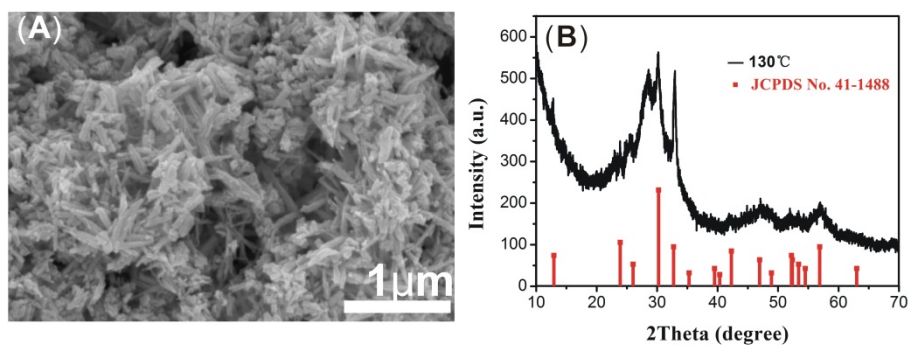

Fig.S2 Sample synthesized with solvothermal temperature of 130 °C. A: the SEM image, B: XRD pattern.

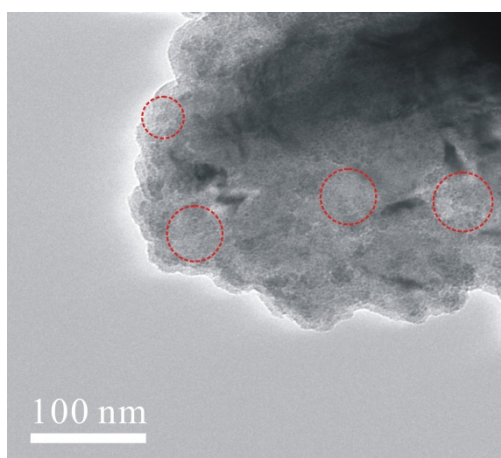

Fig.S3 HRTEM image of as-products collected at 5 h.
